# Supplementary material for: Cloning, expression and characterization of a cold-adapted endo-1, 4-β-glucanase from Citrobacter farmeri A1, a symbiotic bacterium of Reticulitermes labralis
Source: PeerJ. 2016 Nov 8;4:e2679. doi: 10.7717/peerj.2679 (PMC5103814; doi:10.7717/peerj.2679)
Supplement: Supplemental Information 1 [file peerj-04-2679-s001.xlsx]

## Sheet: Sheet1
Effects of pH on the activity of EglC22b
		Absorbance (540nm)
pH	Temperature	Con1	Cont2	Exp1	Exp2				Relative activity=(Exp. activity)/(Con. activity)
3.5	40	0.048	0.048	0.05	0.055
4.5	40	0.043	0.04	0.052	0.051
5.5	40	0.042	0.047	0.166	0.158
6.5	40	0.046	0.044	0.227	0.218
7	40	0.046	0.05	0.226	0.233	Con. activity
8	40	0.043	0.047	0.196	0.204
Con. activity
		Absorbance (540nm)
pH	Temperature	Con1	Cont2	Exp1	Exp2
7	40	0.046	0.05	0.226	0.233
Con1 and Con2: The standard reaction without Eglc22b.
Exp1 and Exp2: The standard reaction with Eglc22b.
