# Supplementary material for: Cloning, expression and characterization of a cold-adapted endo-1, 4-β-glucanase from Citrobacter farmeri A1, a symbiotic bacterium of Reticulitermes labralis
Source: PeerJ. 2016 Nov 8;4:e2679. doi: 10.7717/peerj.2679 (PMC5103814; doi:10.7717/peerj.2679)
Supplement: Supplemental Information 3 [file peerj-04-2679-s003.xlsx]

## Sheet: Sheet1
Effects of temperature on the activity of EglC22b
		Absorbance (540nm)
pH	Temperature	Con1	Cont2	Exp1	Exp2				Relative activity=(Exp. activity)/(Con. activity)
7	5	0.038	0.041	0.128	0.132
7	10	0.038	0.04	0.136	0.132
7	20	0.042	0.044	0.148	0.144
7	30	0.045	0.042	0.227	0.216
7	40	0.041	0.042	0.22	0.224	Con. activity
7	50	0.043	0.042	0.181	0.169
7	60	0.044	0.04	0.076	0.065
7	70	0.039	0.033	0.054	0.05
Con. activity
		Absorbance (540nm)
pH	Temperature	Con1	Cont2	Exp1	Exp2
7	40	0.041	0.042	0.22	0.224
Con1 and Con2: The standard reaction without Eglc22b.
Exp1 and Exp2: The standard reaction with Eglc22b.
