# Supplementary material for: Cloning, expression and characterization of a cold-adapted endo-1, 4-β-glucanase from Citrobacter farmeri A1, a symbiotic bacterium of Reticulitermes labralis
Source: PeerJ. 2016 Nov 8;4:e2679. doi: 10.7717/peerj.2679 (PMC5103814; doi:10.7717/peerj.2679)
Supplement: Supplemental Information 4 [file peerj-04-2679-s004.xlsx]

## Sheet: Sheet1
Temperature stability
Exp. Activity
		Absorbance (540nm)					Relative activity=(Exp. activity)/(Con. activity)
Temperature	Time	Con1	Cont2	Exp1	Exp2
20	30 min	0.046	0.037	0.228	0.211
30	30 min	0.039	0.044	0.226	0.219
40	30 min	0.043	0.043	0.225	0.222
50	30 min	0.041	0.042	0.221	0.213
60	30 min	0.046	0.045	0.059	0.051
Con. activity
		Absorbance (540nm)
pH	Temperature	Con1	Cont2	Exp1	Exp2
7	40	0.043	0.046	0.226	0.229
Con1 and Con2: The standard reaction without Eglc22b.
Exp1 and Exp2: The standard reaction with Eglc22b.
