# Supplementary material for: Cloning, expression and characterization of a cold-adapted endo-1, 4-β-glucanase from Citrobacter farmeri A1, a symbiotic bacterium of Reticulitermes labralis
Source: PeerJ. 2016 Nov 8;4:e2679. doi: 10.7717/peerj.2679 (PMC5103814; doi:10.7717/peerj.2679)
Supplement: Supplemental Information 5 [file peerj-04-2679-s005.xlsx]

## Sheet: Sheet1
Effects of metal ions and chemical reagents on the activity of elgC22b
			Absorbance (540nm)
pH	Temperature	Metal ions and chemical compounds	Con1	Cont2	Exp1	Exp2
7	40	Co2+	0.064	0.062	0.312	0.301
7	40	Cd2+	0.102	0.098	0.225	0.228			Relative activity=(Exp. activity)/(Con. activity)
7	40	Fe3+	0.081	0.085	0.288	0.281
7	40	Zn2+	0.081	0.084	0.202	0.209
7	40	Li+	0.077	0.083	0.206	0.203
7	40	Triton-X-100	0.042	0.054	0.082	0.086
7	40	DMSO	0.052	0.054	0.077	0.075
7	40	Acetonitrile	0.069	0.078	0.139	0.125
7	40	Tween 80	0.073	0.081	0.217	0.219
7	40	SDS	0.062	0.071	0.076	0.075
7	40	EDTA	0.012	0.009	0.116	0.112
Con. activity
		Absorbance (540nm)
pH	Temperature	Con1	Cont2	Exp1	Exp2
7	40	0.043	0.046	0.227	0.225
Con1 and Con2: The standard reaction without Eglc22b.
Exp1 and Exp2: The standard reaction with Eglc22b.
